# Supplementary material for: Plasma Exosome-Enriched Extracellular Vesicles From Lactating Mothers With Type 1 Diabetes Contain Aberrant Levels of miRNAs During the Postpartum Period
Source: PubMed Central journal article supplement (PMC8531745; doi:10.3389/fimmu.2021.744509), 2021-10-08
Supplement: DataSheet_1.pdf [file DataSheet_1.pdf]

## *Supplementary Material*

### Supplementary Tables

**Supplementary Table 1:** Pearson's correlation test of miRNAs and HbA<sub>1c</sub> in the mothers with type 1 diabetes (n=26), two-tailed correlation(r); p<0.05 and with correction for multiple testing using Benjamini-Hochberg procedure (adj. p-value).

| <b>miRNA correlation to HbA<sub>1c</sub> in mothers with type 1 diabetes</b> |                        |                |                    |
|------------------------------------------------------------------------------|------------------------|----------------|--------------------|
| <b>miRNA name</b>                                                            | <b>Correlation (r)</b> | <b>p-value</b> | <b>Adj p-value</b> |
| hsa-miR-6839-5p                                                              | 0.710                  | 0.00005        | 0.0086             |
| hsa-miR-891a-5p                                                              | 0.657                  | 0.00027        | 0.0238             |
| hsa-miR-1260a                                                                | 0.656                  | 0.00027        | 0.0161             |
| hsa-miR-7977                                                                 | 0.637                  | 0.00047        | 0.0208             |
| hsa-miR-874-3p                                                               | 0.633                  | 0.00052        | 0.0183             |

## Supplementary Figures

A

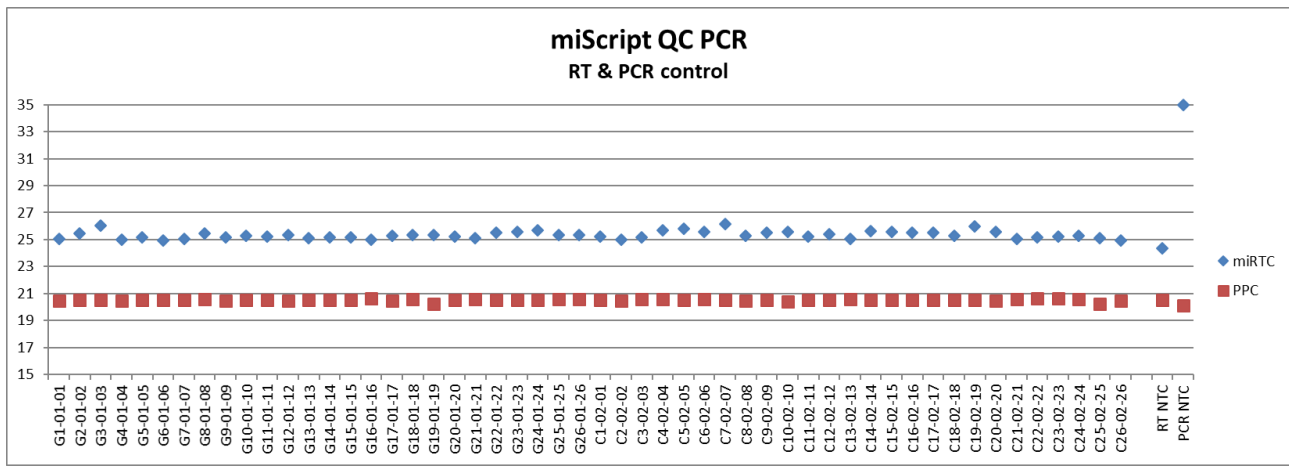

B

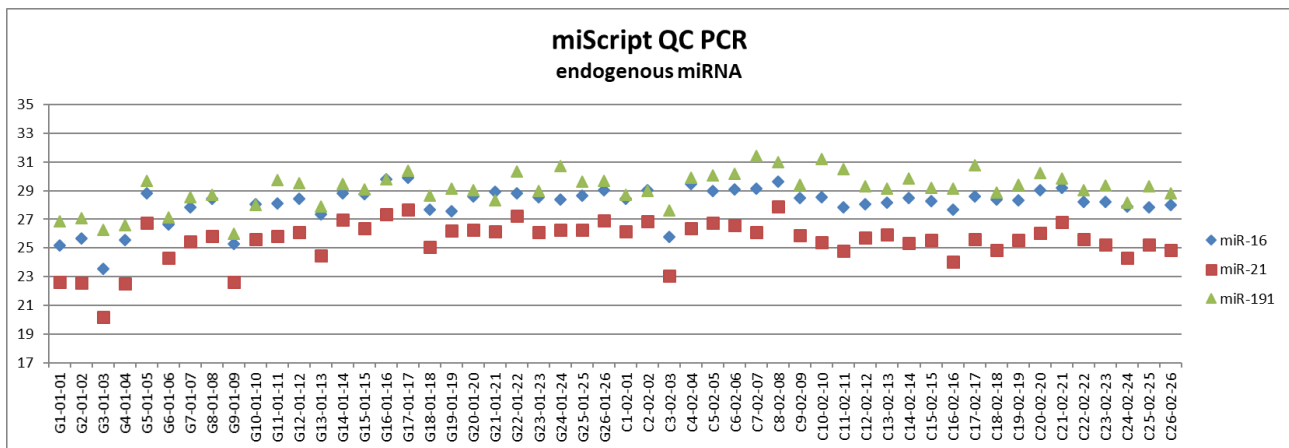

**Supplementary Figure 1. The assessment of RNA extracted from exosome-enriched extracellular vesicles.** (A) Quality control (QC) of RNA extracted from exosome-enriched extracellular vesicles by assessment of reverse transcription (RT) and PCR performances using miRTC miScript Primer Assay and positive PCR control (PPC) assay. (B) The RNA sample quality was further assessed by measured expression of ubiquitously expressed miR-16, miR-21, and miR-191 using miScript miRNA QC PCR Array. These miRNAs are known to be ubiquitously expressed in a wide range of cells, tissues and body fluid samples (including whole blood, serum, and plasma).

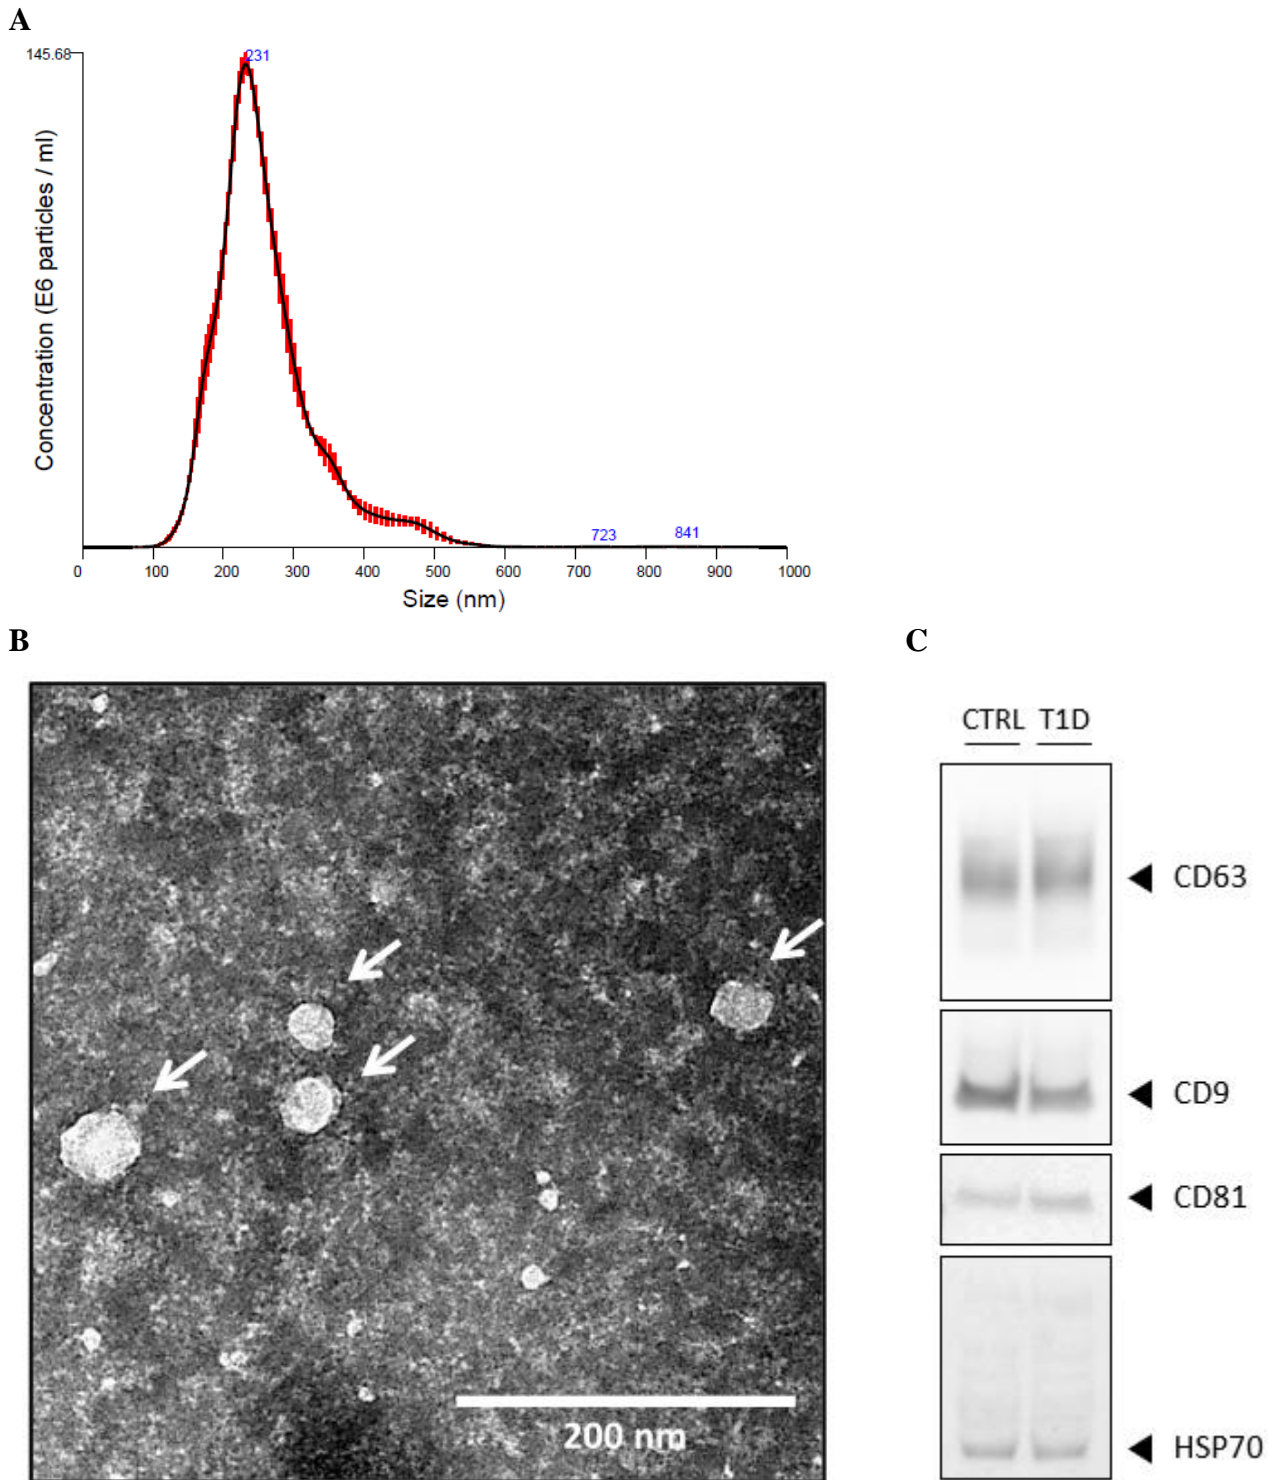

**Supplementary Figure 2. Characterization of exosome-enriched extracellular vesicles derived from plasma samples.** (A) Particle concentration per ml and size distribution (nm)  $\pm$  1 standard error of the mean (red) analyzed by Nanosight NTA analysis. (B) Transmission electron microscopy of freshly prepared plasma-derived extracellular vesicles (indicated by arrows) by staining with 2% phosphotungstic acid. (C) Western blots of CD63 (30-60 kDa), CD9 (25 kDa), CD81 (26 kDa) and HSP70 (70 kDa) on plasma-derived extracellular vesicles from healthy control mothers (CTRL) or mothers with type 1 diabetes (T1D).

**A**

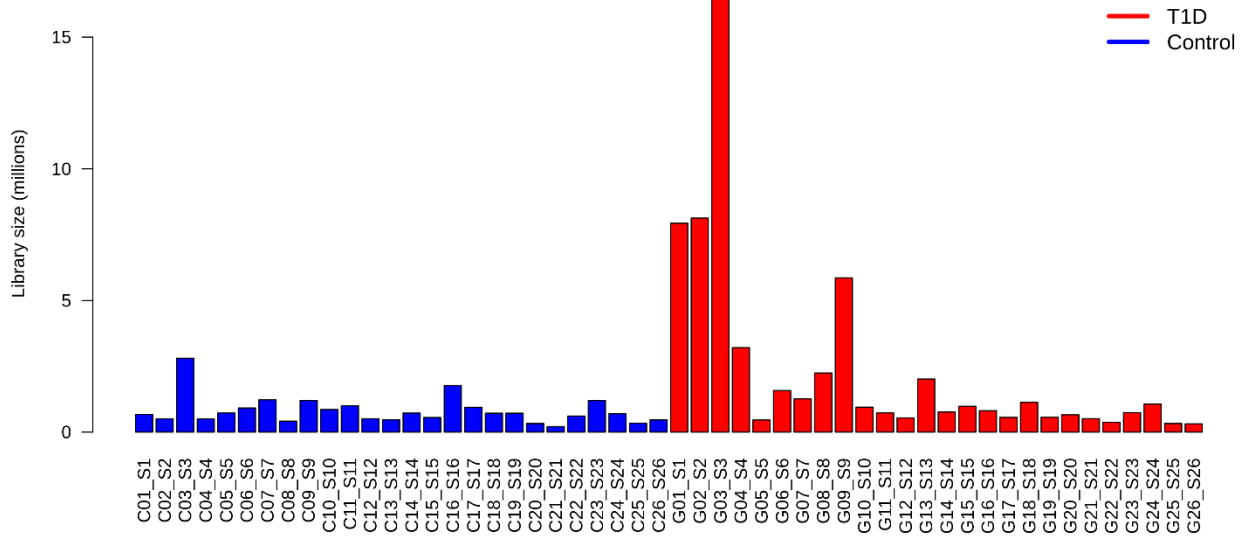

**B**

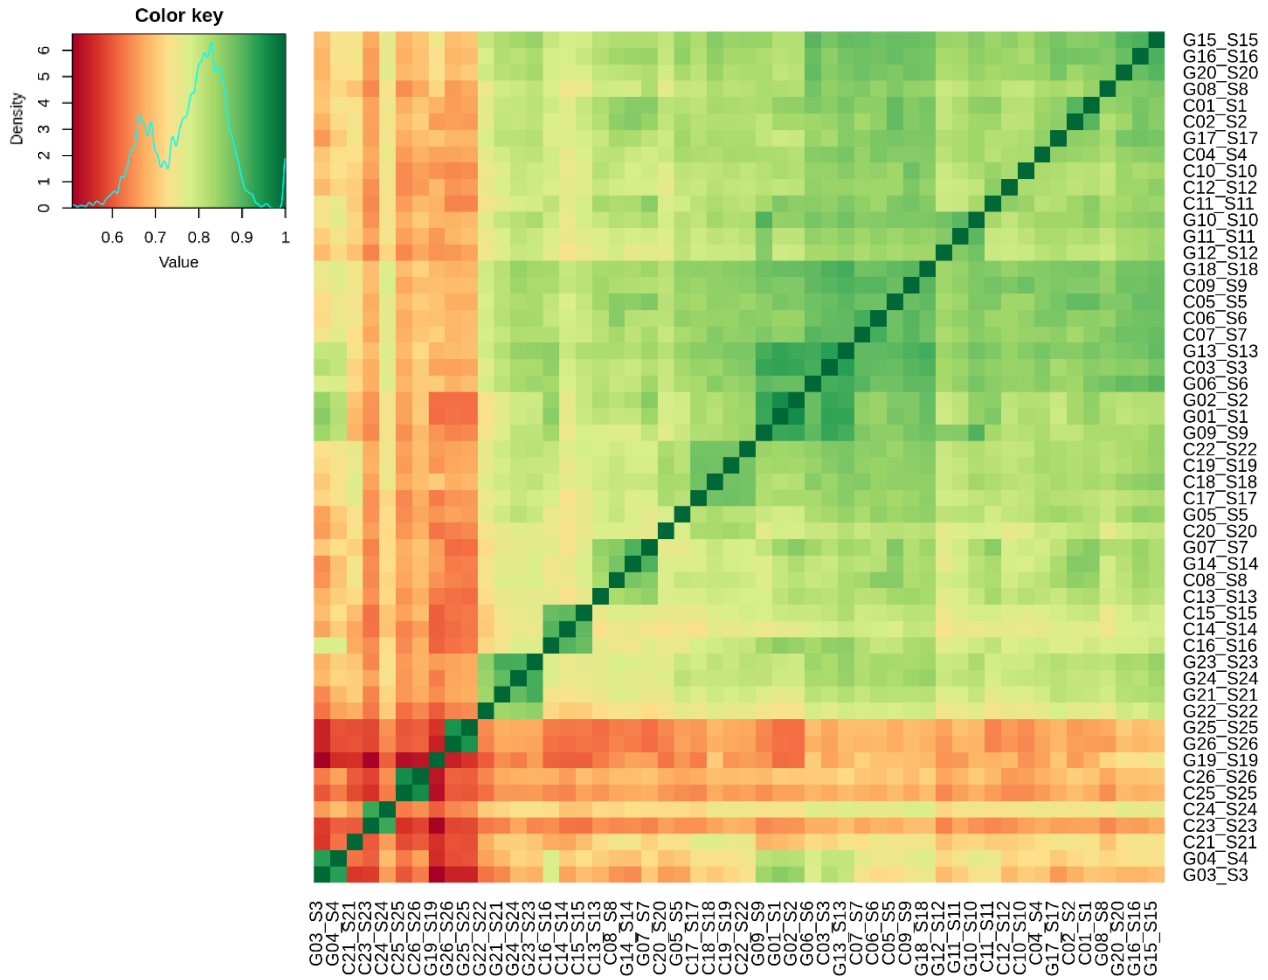

C

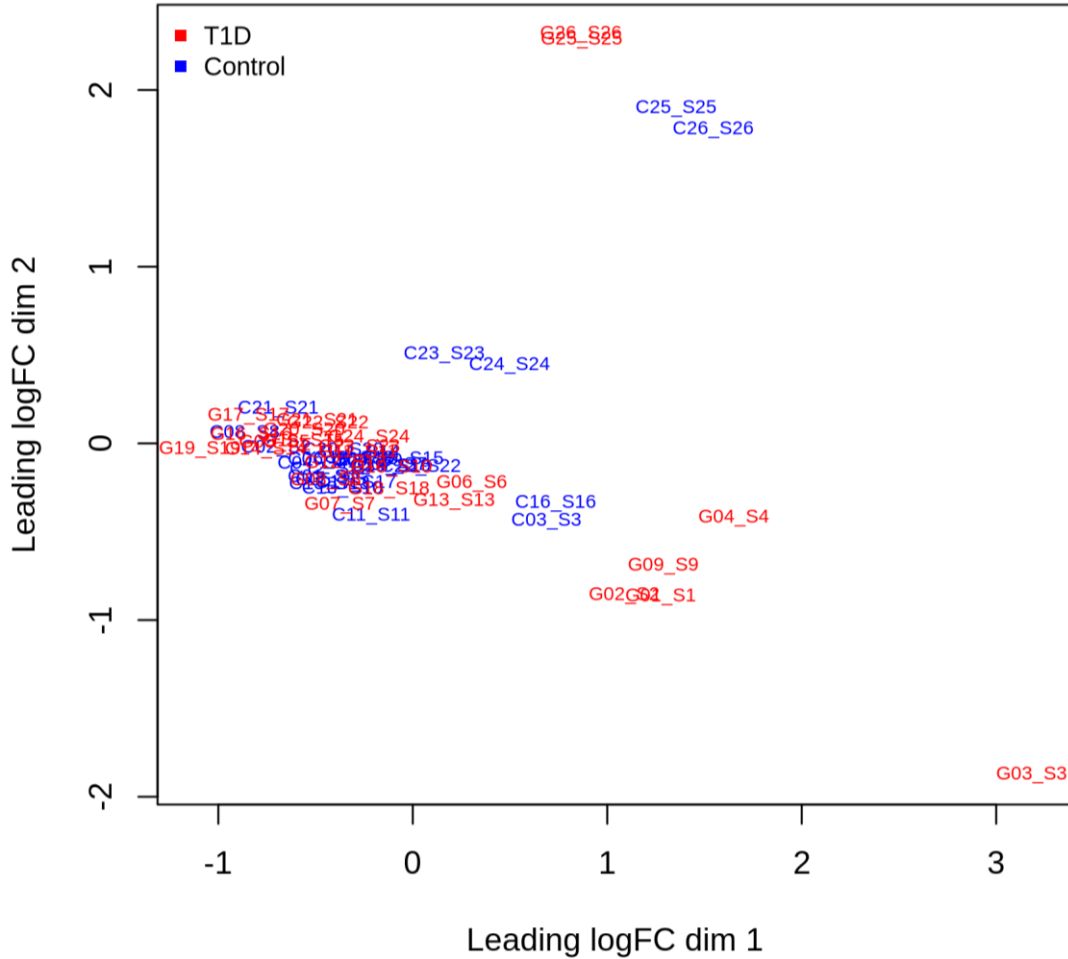

**Supplementary Figure 3. Library size and sample correlations.** (A) The bar plot shows the UMI reads distribution after small RNA sequencing for each sample. The type 1 diabetes (T1D) and control libraries are denoted by red and blue bars, respectively. (B) The correlation heatmap illustrates the relationship between each library for both T1D and control groups. Green indicates a close correlation while red indicates a more distant correlation in the data. (C) Multidimensional scaling (MDS) plot shows biological variability between the T1D and control group libraries.
