# Supplementary material for: Plasma Exosome-Enriched Extracellular Vesicles From Lactating Mothers With Type 1 Diabetes Contain Aberrant Levels of miRNAs During the Postpartum Period
Source: Front Immunol. 2021 Oct 8;12:744509. doi: 10.3389/fimmu.2021.744509 (PMC8531745; doi:10.3389/fimmu.2021.744509)
Supplement: Supplementary file 2 [file Table_2.xlsx]

## Sheet: Diff_exp_miRNAs
Supplementarty Table 2: Log fold changes (logFC) and average log counts per million (logCPM) values for all the differentially expressed miRNAs. LR (log odds ratio), FDR (adjusted p-value).
miRNAs	logFC	logCPM	LR	PValue	FDR
hsa-miR-127-3p	2.86056	9.2887	60.4573	7.51908e-15	1.72112e-11
hsa-miR-766-3p	2.86242	8.28261	33.5865	6.81629e-09	7.80124e-06
hsa-miR-891a-5p	3.12946	6.7364	29.8282	4.72087e-08	3.60202e-05
hsa-miR-539-3p	2.52713	6.36041	26.5844	2.52274e-07	0.000118906
hsa-miR-1297	1.94028	5.09338	26.5281	2.59733e-07	0.000118906
hsa-miR-1-3p	2.68167	9.90787	25.7668	3.85263e-07	0.000146978
hsa-miR-369-3p	3.00573	9.14586	24.9302	5.94425e-07	0.000194377
hsa-miR-339-5p	1.92493	10.2862	24.1665	8.83541e-07	0.000252803
hsa-miR-6839-5p	2.03828	6.07028	22.4051	2.20793e-06	0.000561549
hsa-miR-487b-3p	2.15577	7.41511	21.4562	3.62012e-06	0.000716111
hsa-miR-103a-3p	2.10505	14.4728	21.7025	3.18377e-06	0.000716111
hsa-miR-1307-3p	1.3648	11.0312	21.3864	3.75418e-06	0.000716111
hsa-miR-128-3p	1.72944	10.1738	20.8354	5.00484e-06	0.000881236
hsa-miR-199a-3p	2.37448	15.7987	20.6378	5.54888e-06	0.000903379
hsa-miR-191-5p	1.76902	14.0661	20.5139	5.91991e-06	0.000903379
hsa-miR-454-3p	1.9553	9.05544	20.2607	6.75732e-06	0.000909853
hsa-miR-340-5p	2.27727	10.9325	19.9962	7.75964e-06	0.000941342
hsa-miR-26b-5p	2.15653	14.7848	19.8849	8.22492e-06	0.000941342
hsa-miR-154-5p	1.90165	6.6768	19.9188	8.08001e-06	0.000941342
hsa-miR-186-5p	1.9501	10.9863	19.7437	8.85525e-06	0.000965222
hsa-miR-21-5p	1.91543	15.6758	19.5708	9.69406e-06	0.00100862
hsa-miR-15b-5p	1.67298	10.3952	18.6933	1.53524e-05	0.00130155
hsa-miR-185-5p	1.89563	11.6343	18.3839	1.80578e-05	0.00146151
hsa-miR-338-3p	1.42273	7.71824	18.3132	1.87402e-05	0.00146151
hsa-miR-484	1.1274	8.75166	18.2715	1.91548e-05	0.00146151
hsa-miR-142-3p	1.61651	15.2029	17.7182	2.56161e-05	0.00189146
hsa-miR-376a-3p	2.186	7.35032	17.5738	2.76363e-05	0.00191695
hsa-miR-651-5p	1.75446	6.38202	17.621	2.69588e-05	0.00191695
hsa-miR-20a-5p	2.04983	10.6409	17.4966	2.87817e-05	0.00193769
hsa-miR-184	1.60862	7.23162	17.4158	3.00316e-05	0.00196406
hsa-miR-146a-5p	1.83093	15.3044	17.1218	3.50573e-05	0.00201516
hsa-miR-494-3p	1.80205	7.00273	17.1029	3.5409e-05	0.00201516
hsa-miR-221-3p	1.79113	13.6137	17.0664	3.6095e-05	0.00201516
hsa-miR-152-3p	1.78121	9.96013	17.0937	3.55799e-05	0.00201516
hsa-miR-7-5p	1.65797	9.25128	17.1416	3.46937e-05	0.00201516
hsa-miR-425-5p	1.49185	13.6747	17.0928	3.5597e-05	0.00201516
hsa-miR-421	1.5064	6.72991	16.9908	3.75618e-05	0.00204712
hsa-miR-590-5p	2.1629	4.66348	16.9003	3.93959e-05	0.00206542
hsa-miR-628-5p	1.91945	7.68142	16.8856	3.97023e-05	0.00206542
hsa-miR-7977	1.16175	6.52324	16.79	4.17523e-05	0.0021238
hsa-miR-15b-3p	1.56733	7.90634	16.6507	4.49337e-05	0.00218837
hsa-miR-324-3p	1.32158	6.4871	16.6551	4.48285e-05	0.00218837
hsa-miR-130a-3p	1.88198	9.20499	16.6031	4.6076e-05	0.00219725
hsa-miR-222-3p	1.40872	8.91779	16.5414	4.75991e-05	0.00222356
hsa-miR-15a-5p	1.74999	9.52096	16.4768	4.92502e-05	0.00225467
hsa-miR-493-5p	1.83202	7.94146	16.3884	5.16008e-05	0.00227143
hsa-miR-190a-5p	1.29734	7.99827	16.3998	5.12906e-05	0.00227143
hsa-miR-374a-3p	1.63746	7.26245	16.2412	5.5767e-05	0.0024085
hsa-miR-376c-3p	1.97865	7.54151	16.1297	5.91494e-05	0.00246169
hsa-miR-323a-3p	1.67226	6.62497	16.1494	5.8538e-05	0.00246169
hsa-miR-361-5p	1.46186	10.0135	16.0383	6.20755e-05	0.00253734
hsa-miR-502-3p	1.23665	5.87002	15.998	6.34078e-05	0.00254633
hsa-miR-20b-5p	1.45083	8.05571	15.9306	6.57072e-05	0.00254922
hsa-miR-199b-3p	1.98848	13.3473	15.8784	6.75444e-05	0.00257676
hsa-miR-590-3p	1.95713	9.82671	15.8208	6.96318e-05	0.00257676
hsa-miR-374a-5p	1.91007	9.72952	15.7777	7.12389e-05	0.00258835
hsa-miR-32-5p	1.80048	8.26277	15.6024	7.81534e-05	0.0027522
hsa-miR-2355-3p	1.57386	6.54066	15.6151	7.76322e-05	0.0027522
hsa-miR-107	1.54493	11.6658	15.5623	7.98304e-05	0.00276866
hsa-miR-425-3p	1.50759	9.58502	15.4851	8.31598e-05	0.00279931
hsa-miR-345-5p	1.22135	7.02227	15.4972	8.2628e-05	0.00279931
hsa-miR-30e-3p	1.56039	10.9545	15.2319	9.50834e-05	0.00298145
hsa-miR-130b-3p	1.39694	7.30595	15.2439	9.44831e-05	0.00298145
hsa-miR-6852-3p	1.19803	5.53492	15.3105	9.12071e-05	0.00298145
hsa-miR-339-3p	1.13825	7.61716	15.2714	9.31179e-05	0.00298145
hsa-miR-17-3p	1.60714	6.3927	15.1714	9.81796e-05	0.00303693
hsa-miR-889-3p	1.54767	8.55665	15.0542	0.000104468	0.00318838
hsa-miR-33a-5p	1.4463	6.51137	15.0159	0.000106611	0.00321096
hsa-miR-379-5p	1.74834	9.58381	14.8914	0.000113881	0.00338538
hsa-miR-148b-3p	1.55934	12.2054	14.6443	0.00012983	0.00376177
hsa-miR-143-3p	1.51279	12.915	14.6632	0.000128532	0.00376177
hsa-miR-28-3p	1.36688	10.6177	14.5566	0.000136014	0.00389169
hsa-miR-23b-3p	1.29529	9.55076	14.4945	0.000140569	0.00397237
hsa-miR-1277-5p	1.93808	8.54236	14.4685	0.000142519	0.00397276
hsa-miR-19a-3p	1.80952	7.90816	14.3625	0.000150773	0.00401303
hsa-miR-181a-3p	1.03413	8.44622	14.4063	0.000147309	0.00401303
hsa-miR-22-5p	1.38238	5.78937	14.263	0.000158961	0.00418232
hsa-miR-409-5p	1.39365	5.80608	14.096	0.000173714	0.00451855
hsa-miR-19b-3p	1.68558	9.83193	14.0733	0.000175818	0.00452188
hsa-miR-126-5p	1.62469	15.0755	14.0332	0.000179607	0.00456801
hsa-miR-500a-3p	1.35522	6.69665	13.9641	0.000186336	0.00463611
hsa-miR-1271-5p	1.40282	5.2441	13.9299	0.000189752	0.00465805
hsa-miR-4454	1.13777	7.18938	13.9148	0.000191287	0.00465805
hsa-miR-3681-5p	1.76213	5.04446	13.8542	0.000197555	0.00476004
hsa-miR-323b-3p	1.51684	7.34955	13.8222	0.000200946	0.00477607
hsa-miR-374b-5p	1.67533	8.79079	13.7823	0.000205261	0.0047943
hsa-miR-942-5p	1.12111	6.93175	13.742	0.000209714	0.00484884
hsa-miR-93-5p	1.50785	14.1899	13.7092	0.000213402	0.00488476
hsa-miR-26a-1-3p	1.35081	5.74785	13.6866	0.000215995	0.00489517
hsa-miR-26a-5p	1.49033	15.2848	13.5776	0.000228907	0.00503815
hsa-miR-369-5p	1.4645	7.1851	13.5914	0.000227225	0.00503815
hsa-miR-6081	1.08071	4.70669	13.5354	0.000234108	0.00510355
hsa-miR-25-3p	1.2057	13.5595	13.4717	0.000242189	0.00518104
hsa-miR-92a-3p	1.10017	13.8039	13.474	0.000241896	0.00518104
hsa-miR-27b-3p	1.48283	11.8347	13.4476	0.000245324	0.0051995
hsa-miR-199a-5p	1.30769	8.38848	13.4042	0.00025106	0.00527226
hsa-miR-411-5p	1.6551	8.104	13.3351	0.000260477	0.00542029
hsa-miR-548ap-5p/548j-5p	1.29903	8.27183	13.283	0.000267827	0.00552302
hsa-miR-654-3p	1.59647	9.82785	13.2613	0.000270945	0.00553743
hsa-miR-17-5p	1.61474	9.49217	13.1923	0.000281103	0.00564424
hsa-miR-326	1.28312	8.6785	13.1932	0.000280966	0.00564424
hsa-miR-23a-3p	1.37428	11.7573	13.0859	0.000297532	0.00587452
hsa-miR-493-3p	1.49875	6.72711	13.0484	0.000303543	0.00593856
hsa-miR-548ap-3p/548t-3p/548aa	1.13846	6.04976	12.8434	0.000338673	0.00651448
hsa-miR-24-3p	1.32077	11.4833	12.7674	0.000352708	0.0067279
hsa-miR-135a-5p	1.59736	5.53087	12.701	0.000365459	0.0068011
hsa-miR-769-5p	1.16066	7.90051	12.7043	0.000364811	0.0068011
hsa-miR-548a-3p	1.46662	5.64922	12.591	0.000387614	0.007036
hsa-miR-199b-5p	1.46541	5.89471	12.5777	0.000390377	0.007036
hsa-miR-548e-3p	1.28164	5.3543	12.6128	0.000383116	0.007036
hsa-miR-3168	1.99712	8.8628	12.55	0.000396215	0.00708224
hsa-miR-8485	1.54678	5.14912	12.5218	0.000402224	0.00708224
hsa-miR-1277-3p	1.15192	4.64206	12.5319	0.000400065	0.00708224
hsa-miR-409-3p	1.56318	10.4619	12.3975	0.000429898	0.00739878
hsa-miR-1185-1-3p	1.97408	5.01586	12.3779	0.000434456	0.00740007
hsa-miR-376b-3p	1.55145	4.92755	12.3541	0.000440027	0.00740007
hsa-miR-21-3p	1.22203	7.52774	12.3389	0.000443625	0.00740007
hsa-miR-628-3p	1.07959	8.40197	12.3392	0.000443541	0.00740007
hsa-miR-221-5p	1.38681	7.14163	12.2176	0.000473414	0.00779601
hsa-miR-382-3p	1.49239	8.20184	12.0335	0.000522517	0.0084767
hsa-miR-335-3p	1.20395	7.47654	12.0217	0.000525859	0.0084767
hsa-miR-223-3p	1.23251	15.9177	11.9932	0.00053395	0.00854693
hsa-miR-30c-5p	1.09671	9.15125	11.9734	0.00053964	0.00857803
hsa-miR-1260a	1.03429	6.19505	11.908	0.000558925	0.00876287
hsa-miR-335-5p	1.5109	9.93173	11.8865	0.000565425	0.00880448
hsa-miR-30d-5p	1.20881	14.698	11.6257	0.000650464	0.00999269
hsa-miR-151b/151a-5p	1.20959	8.87173	11.5511	0.000677094	0.0101965
hsa-miR-532-5p	1.12484	8.73989	11.5233	0.00068728	0.0102822
hsa-miR-99b-5p	1.04082	10.2891	11.511	0.000691849	0.0102834
hsa-miR-30e-5p	1.29341	12.9689	11.4544	0.000713244	0.0104575
hsa-miR-145-5p	1.03927	5.98918	11.444	0.000717268	0.0104575
hsa-miR-134-5p	1.50896	10.2093	11.3741	0.000744735	0.0106544
hsa-miR-330-5p	1.22593	4.96102	11.3826	0.000741366	0.0106544
hsa-miR-146b-5p	1.39411	12.0811	11.3172	0.000767926	0.0108505
hsa-miR-200a-3p	1.00257	5.95747	11.2391	0.000800917	0.0111109
hsa-miR-301a-3p	1.24936	6.35439	11.1269	0.000850834	0.0117045
hsa-miR-378a-3p	1.13293	8.66142	11.0371	0.000893058	0.0120959
hsa-miR-320a	1.10747	10.7443	10.9986	0.000911811	0.0122773
hsa-miR-126-3p	1.1084	16.6993	10.9651	0.000928458	0.0124283
hsa-miR-491-5p	1.02053	6.63087	10.9255	0.000948514	0.0125699
hsa-let-7g-5p	1.18228	12.0247	10.7118	0.00106453	0.0136893
hsa-miR-652-3p	1.26059	9.34103	10.446	0.00122913	0.015332
hsa-miR-4523	1.01956	5.37013	10.417	0.00124858	0.0154486
hsa-miR-142-5p	1.16124	13.0998	10.3512	0.00129392	0.0157541
hsa-miR-136-3p	1.16145	7.41397	10.3226	0.00131413	0.0159156
hsa-miR-27a-3p	1.26058	10.3328	10.3031	0.0013281	0.0159164
hsa-miR-548n	1.10835	4.86853	10.0375	0.00153381	0.0181912
hsa-miR-379-3p	1.01436	4.17173	9.91258	0.00164153	0.0191707
hsa-miR-9-5p	1.09049	6.61774	9.73847	0.00180451	0.0205499
hsa-miR-22-3p	1.08881	9.76172	9.27254	0.00232615	0.0249979
hsa-miR-133a-3p	1.04418	6.72544	9.28662	0.00230834	0.0249979
hsa-let-7f-5p	1.08492	16.3017	9.21461	0.00240091	0.0256808
hsa-miR-30b-5p	1.00923	8.38036	9.19507	0.00242668	0.025716
hsa-miR-543	1.11742	4.96672	9.04487	0.00263432	0.0269195
hsa-miR-101-3p	1.18867	12.5614	8.88154	0.00288068	0.029048
hsa-miR-223-5p	1.06095	10.6924	8.84564	0.00293789	0.0294949
hsa-miR-330-3p	1.12627	5.07593	8.71579	0.00315466	0.0312598
hsa-let-7f-2-3p	1.11946	4.62493	8.66937	0.00323603	0.0316797
hsa-miR-4492	1.21218	4.05523	8.58791	0.00338403	0.0328222
hsa-miR-874-3p	1.10263	6.22024	8.51066	0.00353072	0.0339732
hsa-miR-423-3p	1.06369	11.1062	8.5098	0.00353239	0.0339732
hsa-miR-556-3p	1.04362	5.51465	8.43607	0.0036785	0.0349725
hsa-miR-450b-5p	1.00789	5.36935	8.43428	0.00368212	0.0349725
hsa-miR-103b	1.01918	11.7786	8.34892	0.00385917	0.0360557
hsa-miR-548au-5p/548c-5p/548o-5p/548am-5p	1.09863	5.6552	7.75581	0.00535401	0.0453901
hsa-miR-548ao-5p	1.00121	5.30931	7.74603	0.00538308	0.0454681
hsa-miR-329-3p	1.11317	5.56888	7.64763	0.00568471	0.046639
hsa-miR-6801-3p	-2.15894	6.47683	20.3814	6.34445e-06	0.000907653
hsa-miR-6827-3p	-2.84282	5.37825	18.8308	1.42845e-05	0.00130155
hsa-miR-4446-5p	-1.96009	7.1047	18.7503	1.48999e-05	0.00130155
hsa-miR-6873-5p	-1.27067	5.98416	18.78	1.46696e-05	0.00130155
hsa-miR-4652-3p	-1.10756	7.36548	15.964	6.45572e-05	0.00254778
hsa-miR-7156-5p	-1.34898	7.1235	13.9986	0.000182944	0.00460175
hsa-miR-8059	-1.21255	6.2735	13.6625	0.000218781	0.0049097
hsa-miR-563	-1.25408	3.49057	13.0211	0.000307998	0.00597463
hsa-miR-1324	-1.576	4.77049	11.5874	0.000664017	0.0100658
